# Supplementary material for: Carbon dots based turn-on fluorescent probes for the sensitive determination of glyphosate in environmental water samples
Source: Royal Society of Chemistry journal article supplement (doi:10.1039/c6ra10115a), 2016-01-01
Supplement: c6ra10115a1.pdf [file c6ra10115a1.pdf]

## Supporting information for

### Carbon dots based turn-on fluorescent probes for the sensitive determination of glyphosate in environment water samples

Long Wang <sup>a</sup>, Yidan Bi <sup>a</sup>, Jia Gao <sup>a</sup>, Yijia Li <sup>a</sup>, Hong Ding <sup>b</sup> and Lan Ding <sup>a\*</sup>

<sup>a</sup>College of Chemistry, Jilin University, 2699 Qianjin Street, Changchun 130012, PR  
China

<sup>b</sup>State Key Laboratory of Inorganic Synthesis and Preparative Chemistry, College of  
Chemistry, Jilin University, Changchun 130012, PR China

#### Quantum yield measurement

The quantum yield of the as-prepared CDs was determined by the following equation:

$$Q=Q_R \frac{I}{I_R} \frac{A_R}{A} \frac{n^2}{n_R^2}$$

where  $Q$  is the quantum yield,  $I$  is the measured integrated emission intensity,  $n$  is the refractive index, and  $A$  represents UV–vis absorbance at 360 nm which was kept under 0.1 in the 10 mm fluorescence cuvette to minimize re-absorption effects. The subscript  $R$  refers to the reference fluorophore of known quantum yield. Quinine

\* Corresponding author.

Phone: +86-431-85168399.

Fax: +86-431-85112355.

E-mail: dinglan@jlu.edu.cn

sulfate in 0.1 M H<sub>2</sub>SO<sub>4</sub> (QY=0.54 at 360 nm) was chose as the reference.

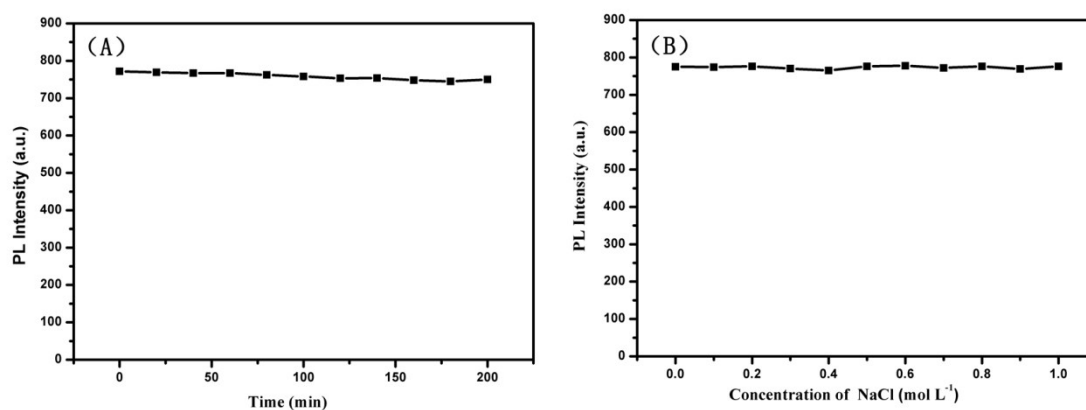

**Fig. S1** (A) PL intensity of the CDs during continuous excitation at 365 nm with a UV beam. (B) PL intensities of the CDs after adding various concentrations of NaCl solutions. Excitation wavelength: 360 nm; Emission wavelength: 437 nm.

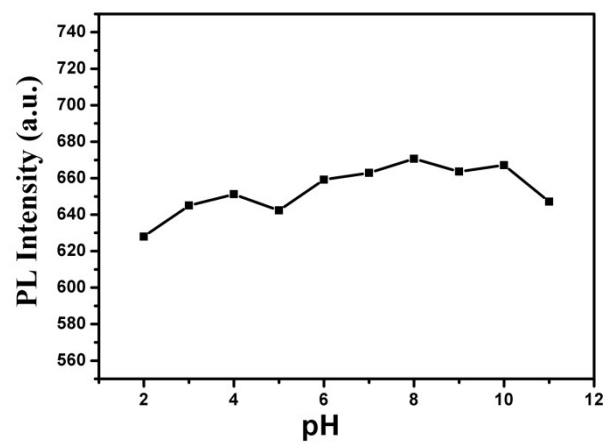

**Fig. S2** Effect of pH on the fluorescence intensity of the CDs.

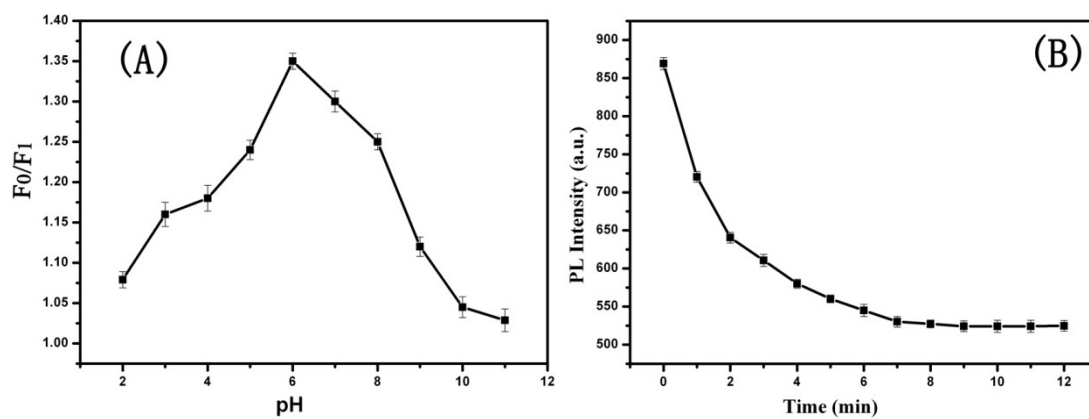

**Fig. S3** (A) The optimization of pH and incubation time for Cu<sup>2+</sup> detection.  $F_0$  and  $F_1$  are the fluorescence intensities of CDs in the absence and presence of Cu<sup>2+</sup> respectively.

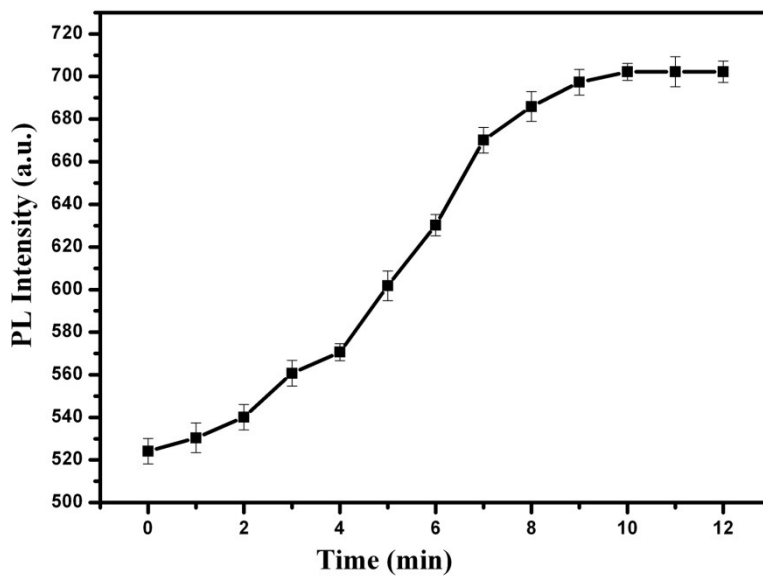

**Fig. S4** The optimization of the incubation time for glyphosate detection. pH=6.0, 2  $\mu\text{g mL}^{-1}$  glyphosate, 25  $\mu\text{M Cu}^{2+}$ .

**Table S1** Comparison of different methods for determination of glyphosate.

| Methods                                | Linear                    | Detection                 | References |
|----------------------------------------|---------------------------|---------------------------|------------|
|                                        | range                     | Limit                     |            |
|                                        | ( $\mu\text{g mL}^{-1}$ ) | ( $\mu\text{g mL}^{-1}$ ) |            |
| HPLC with UV detector (derivatization) | 0.3-48.5                  | 0.009                     | 6          |
| Anion-exchange chromatography          | 0.0-16.9                  | 0.038                     | 3          |
| Spectrophotometric (derivatization)    | 0.1-3.5                   | 0.04                      | 55         |
| Colorimetric sensor                    | 0.1-500                   | 0.1                       | 56         |
| Hydrophilic interaction Chromatography | 0.1-34                    | 0.1                       | 57         |
| Diffuse reflectance spectroscopy       | 50-500                    | 7.28                      | 58         |
| Fluorescence                           | 0.03-10                   | 0.016                     | This work  |

**Table S2** Analytical results for the determination of glyphosate in environmental water samples.

| Sample       | Concentration of glyphosate<br>( $\mu\text{g mL}^{-1}$ ) |                | Recovery<br>(%) | RSD (n = 3,<br>%) |
|--------------|----------------------------------------------------------|----------------|-----------------|-------------------|
|              | Amount added                                             | Amount found   |                 |                   |
|              |                                                          | 0              | Not detectable  | /                 |
| Qing Lake    | 0.3                                                      | 0.28           | 93.3            | 1.51              |
|              | 2.5                                                      | 2.47           | 98.8            | 3.27              |
|              | 0                                                        | Not detectable | /               | /                 |
| Yan Lake     | 0.3                                                      | 0.29           | 96.7            | 2.36              |
|              | 2.5                                                      | 2.52           | 100.8           | 4.61              |
|              | 0                                                        | Not detectable | /               | /                 |
| Guanlan Lake | 0.3                                                      | 0.32           | 106.7           | 3.43              |
|              | 2.5                                                      | 2.49           | 99.6            | 1.67              |
